# Supplementary material for: Linked-read sequencing of gametes allows efficient genome-wide analysis of meiotic recombination
Source: PubMed Central journal article supplement (PMC6754367; doi:10.1038/s41467-019-12209-2), 2019-09-20
Supplement: 41467_2019_12209_MOESM4_ESM.pdf [file 41467_2019_12209_MOESM4_ESM.pdf]

## **Description of Additional Supplementary Files**

Filename: Supplementary\_Data\_1.xlsx

Description: Sequencing summary

Filename: Supplementary\_Data\_2.xlsx

Description: CO benchmark dataset

Filename: Supplementary\_Data\_3.xlsx

Description: Criteria for CO molecule filtering

Filename: Supplementary\_Data\_4.xlsx

Description: Col-0 and Ler allelic markers

Filename: Supplementary\_Data\_5.xlsx

Description: Random overlapping of independent COs

Filename: Supplementary\_Data\_6.xlsx

Description: Molecule coverage per CO for various pool size

Filename: Supplementary\_Data\_7.xlsx

Description: Comparison on costs of different technologies
